# Supplementary material
Source: PubMed Central journal article supplement (PMC3093872)

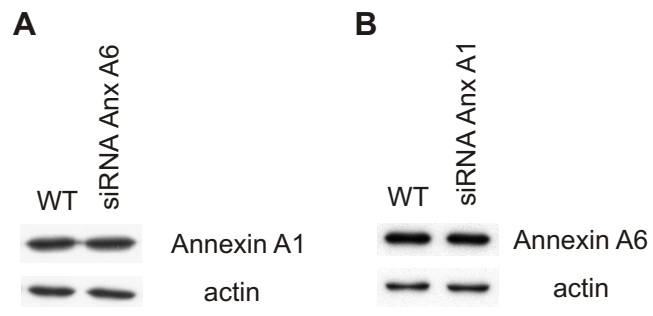

Figure S1

Supplement: supp_M110.187625_jbc.M110.187625-1.pdf [file supp_M110.187625_jbc.M110.187625-1.pdf]

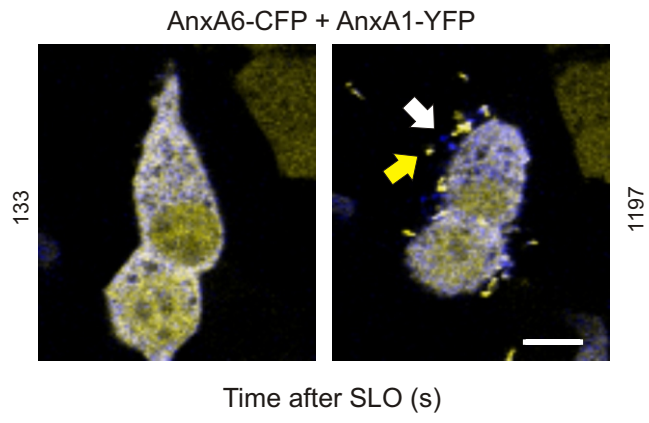

Figure S2

Supplement: supp_M110.187625_jbc.M110.187625-2.pdf [file supp_M110.187625_jbc.M110.187625-2.pdf]
